# Supplementary material for: Assessment of the Yam Landraces (Dioscorea spp.) of DR Congo for Reactions to Pathological Diseases, Yield Potential, and Tuber Quality Characteristics
Source: MDPI journal article supplement (doi:10.3390/agriculture12050599), 2022-04-24
Supplement: s1 [file s1]

**Table S1:** List of the landrace accessions with better performance over checks mean for most preferred farmers and consumer traits and their stability

| s/n | Genotype  | Yield | DMC   | YMV  | YAD  | TUBOXI | Stability | Rank (Stability) |
|-----|-----------|-------|-------|------|------|--------|-----------|------------------|
| 1   | TDa21_169 | 25.88 | 38.43 | 5.68 | 6.89 | 0.80   | 0.00      | 0                |
| 2   | TDr21_162 | 21.19 | 43.40 | 5.85 | 5.44 | 0.05   | 0.00      | 0                |
| 3   | TDc21_059 | 19.30 | 38.00 | 6.32 | 6.11 | 0.06   | 0.15      | 7                |
| 4   | TDr21_089 | 21.25 | 41.43 | 5.87 | 6.08 | 0.95   | 0.17      | 11               |
| 5   | TDr21_142 | 17.74 | 38.54 | 5.02 | 6.12 | 0.05   | 0.18      | 13               |
| 6   | TDr21_037 | 21.58 | 36.58 | 5.86 | 6.70 | 0.05   | 0.35      | 19               |
| 7   | TDa21_080 | 21.35 | 36.10 | 5.89 | 6.89 | 0.05   | 0.46      | 22               |
| 8   | TDr21_153 | 18.61 | 40.32 | 5.86 | 6.87 | 0.05   | 0.46      | 24               |
| 9   | TDr21_167 | 24.39 | 37.23 | 5.84 | 6.12 | 0.95   | 0.48      | 25               |
| 10  | TDr21_154 | 25.52 | 36.30 | 5.87 | 5.96 | 0.27   | 1.18      | 46               |
| 11  | TDc21_190 | 33.08 | 36.54 | 6.71 | 5.40 | 0.05   | 1.59      | 52               |
| 12  | TDr21_134 | 20.11 | 39.09 | 6.71 | 5.47 | 0.05   | 1.60      | 54               |
| 13  | TDa21_073 | 23.35 | 38.21 | 5.47 | 6.56 | 0.05   | 1.72      | 57               |
| 14  | TDa21_152 | 23.84 | 38.05 | 5.05 | 6.90 | 0.28   | 2.06      | 64               |
| 15  | TDr21_131 | 25.25 | 39.39 | 5.03 | 5.38 | 0.05   | 2.18      | 67               |
| 16  | TDa21_050 | 19.85 | 36.74 | 5.47 | 6.71 | 0.05   | 2.32      | 68               |
| 17  | TDa21_005 | 21.75 | 38.87 | 5.26 | 7.12 | 0.13   | 2.98      | 75               |
| 18  | TDr21_163 | 33.02 | 36.54 | 5.04 | 6.22 | 0.05   | 3.05      | 77               |
| 19  | TDa21_034 | 24.09 | 37.78 | 5.26 | 6.90 | 0.20   | 3.16      | 78               |
| 20  | TDr21_099 | 35.81 | 37.57 | 5.04 | 6.96 | 0.95   | 3.46      | 80               |
| 21  | TDr21_004 | 50.21 | 37.15 | 5.00 | 6.12 | 0.05   | 3.73      | 81               |
| 22  | TDr21_033 | 23.20 | 39.54 | 4.55 | 6.58 | 0.94   | 5.12      | 90               |
| 23  | TDr21_183 | 19.07 | 38.14 | 5.87 | 6.45 | 0.05   | 5.16      | 92               |
| 24  | TDr21_077 | 24.31 | 36.90 | 6.31 | 6.53 | 0.50   | 6.14      | 95               |
| 25  | TDa21_014 | 22.88 | 37.98 | 5.24 | 5.82 | 0.27   | 6.25      | 96               |
| 26  | TDa21_160 | 21.61 | 36.11 | 5.04 | 7.21 | 0.50   | 6.54      | 98               |
| 27  | TDa21_032 | 21.32 | 37.18 | 5.68 | 6.71 | 0.05   | 7.07      | 100              |
| 28  | TDa21_003 | 21.26 | 37.15 | 4.84 | 6.71 | 0.05   | 7.97      | 103              |
| 29  | TDr21_006 | 18.91 | 37.91 | 5.22 | 6.37 | 0.05   | 9.31      | 107              |
| 30  | TDc21_188 | 22.33 | 35.70 | 4.22 | 5.58 | 0.95   | 10.90     | 112              |
| 31  | TDp21_159 | 22.90 | 38.50 | 5.03 | 5.26 | 0.27   | 11.82     | 114              |
| 32  | TDr21_039 | 35.87 | 39.55 | 5.46 | 5.96 | 0.05   | 14.29     | 116              |
| 33  | TDa21_144 | 22.72 | 36.23 | 4.63 | 6.75 | 0.20   | 17.21     | 119              |
| 34  | TDr21_013 | 18.46 | 36.30 | 5.66 | 6.08 | 0.05   | 25.80     | 131              |
| 35  | TDr21_067 | 21.19 | 37.59 | 5.43 | 5.44 | 0.50   | 33.30     | 135              |
| 36  | TDa21_009 | 21.63 | 38.58 | 5.68 | 6.93 | 0.05   | 36.75     | 139              |
| 37  | TDr21_045 | 21.77 | 39.42 | 6.08 | 5.59 | 0.80   | 37.12     | 140              |
| 38  | TDr21_185 | 19.83 | 38.10 | 5.47 | 6.34 | 0.50   | 75.42     | 153              |
| 39  | TDr21_016 | 19.43 | 36.66 | 5.42 | 5.41 | 0.05   | 79.29     | 154              |

|             |           |       |       |      |      |      |        |     |
|-------------|-----------|-------|-------|------|------|------|--------|-----|
| 40          | TDr21_137 | 25.89 | 38.55 | 5.27 | 5.96 | 0.28 | 93.17  | 157 |
| 41          | TDa21_068 | 23.32 | 36.69 | 4.84 | 6.93 | 0.20 | 117.81 | 159 |
| 42          | TDr21_017 | 27.50 | 39.76 | 5.42 | 6.77 | 0.50 | 153.24 | 162 |
| 43          | TDr21_106 | 21.20 | 38.23 | 5.86 | 6.01 | 0.28 | 159.48 | 163 |
| 44          | TDc21_135 | 24.05 | 37.60 | 5.05 | 6.41 | 0.94 | 160.09 | 164 |
| 45          | TDr21_115 | 23.03 | 37.47 | 5.88 | 6.01 | 0.27 | 166.85 | 166 |
| 46          | TDr21_177 | 24.52 | 40.40 | 6.28 | 5.94 | 0.05 | 180.66 | 167 |
| 47          | TDr21_164 | 22.65 | 38.74 | 5.42 | 6.12 | 0.05 | 200.19 | 168 |
| 48          | TDr21_060 | 22.61 | 36.26 | 5.28 | 6.11 | 0.06 | 202.79 | 169 |
| 49          | TDr21_047 | 21.00 | 37.55 | 5.45 | 6.70 | 0.72 | 269.95 | 170 |
| 50          | TDc21_117 | 23.60 | 35.70 | 5.66 | 5.40 | 0.72 | 309.65 | 172 |
| 51          | TDr21_166 | 29.20 | 41.85 | 5.42 | 5.96 | 0.05 | 389.06 | 175 |
| Checks mean |           | 17.40 | 35.42 | 6.72 | 7.21 |      |        |     |

---

*DMC= Dry matter content; TUBOXI= Intensity of tuber oxidation; YMV= Yam mosaic virus disease; YAD= Yam anthracnose disease; Stability= Shukla's stability.*
